# Supplementary material for: Intron evolution in Neurospora : the role of mutational bias and selection
Source: HighWire-hosted journal article supplement (doi:10.1101/gr.175653.114), 2014-10-23
Supplement: Supplemental_Figure_Legends.docx [file Supplemental_Figure_Legends.docx]

**Supplementary files**

Figure S1. Polymorphism data for intron gains in *N. tetrasperma* populations. Phylogenomic tree for *N. tetrasperma* populations is presented with branches for different lineages shown in different colors. For each intron site, the first column indicates intron present (red), absent (white) or data missing (grey), and the second to fifth column indicate intron position (magenta), intron GC content (blue), intron length (green) and intron phase (yellow).

Figure S2. Polymorphic data for intron losses in *N. tetrasperma* populations. Phylogenomic tree for *N. tetrasperma* populations is presented with branches for different lineages shown in different colors. For each intron site, the first column indicates intron present (red), absent (white) or data missing (grey), and the second to fifth column indicate intron position (magenta), intron GC content (blue), intron length (green) and intron phase (yellow).

Figure S3. Frequency spectra of neutral SNPs in (A) the region of suppressed recombination, SR,, and (B) the recombining region, R, for Lineage 5, 8 and 10.

Figure S4. Frequency spectra of SNPs, gained and lost introns with fixation information in three lineages of *N. tetrasperma*: (A) Lineage 5, (B) Lineage 8 and (C) Lineage 10.

Figure S5. Frequency spectrum of SNPs, gained and lost intron polymorphisms in all *N. tetrasperma* samples.

Figure S6. Frequency spectra for SNPs, gained and lost intron polymorphisms in *N. tetrasperma*: (A) recombining region, and (B) suppressed-recombining region.

Figure S7. Genetic diversity of (A) fixed introns and (B) polymorphic introns compared to the genomic background of conserved introns.

Figure S8. Multiple sequence alignment for intron gain polymorphism NCU02858T0-13. The first and last 40 nucleotide sites are from the adjacent exons, and the central region in between represents the intronic sequence. The strains not included in the alignment indicate data missing in the corresponding genomes.

Table S1. The relative position of lost introns in *Neurospora.* The relative position was calculated from 5’ to 3’ within a gene. tetra_a is short for *N. tetrasperma a*, tetraA for *N. tetrasperma A*, and crassa for *N. crassa*.

Table S2. List of resequenced strains of *Neurospora tetrasperma*

Supplementary methods.
